# Supplementary material for: Functionalised bicyclic alcohols by enantioselective α-deprotonation–rearrangement of meso-epoxides†
Source: Royal Society of Chemistry journal article supplement (doi:10.1039/b105369h), 2001-01-01
Supplement: b105369h.doc [file b105369h.doc]

**Supplementary data**

**Functionalised bicyclic alcohols by enantioselective -deprotonation-rearrangement of *meso*-epoxides**

Electronic supplementary information (ESI): the preparation and characterisation of derivatives for ee determinations, epoxides **36** - **38**, **44**, **44-D** and **44** (R = trisyl).

**David M. Hodgson,* Iain D. Cameron, Martin Christlieb, Rebecca Green, Gary P. Lee and Lesley A. Robinson**

Dyson Perrins Laboratory, Department of Chemistry, University of Oxford, South Parks Road, Oxford, UK OX1 3QY

**Derivatisation of bicyclic alcohol 9 (*via* triol 12) for *ee* determination**

**2,6-Dibenzoylbicyclo[3.3.0]octanol**

Triol **12** (4.0 mg, 0.025 mmol) and benzoyl chloride (0.029 cm3, 0.25 mmol) were stirred in pyridine (0.5 cm3) for 16 h. The reaction was then diluted with EtOAc (5 cm3) before being washed with aqueous CuSO4 (3 x 5 cm3) and brine (5 cm3). The organic layer was dried and evaporated under reduced pressure. Purification of the residue by column chromatography (50% EtOAc in light petroleum) gave the title compound (5 mg, 55%) as an oil; *R*f 0.40 (50% EtOAc in light petroleum); *v*max/cm1 3342br m, 2968m, 1717s, 1451m, 1271s, 1115m and 710s; **H(400 MHz) 8.15-8.04 (4 H, m, Ar), 7.64-7.57 (2 H, m, Ar), 7.51-7.46 (4 H, m, Ar), 5.69-5.65 (1 H, m, C(6)H), 5.17 (1 H, dd, *J* 10.4 and 6.9, C(2)H), 2.80-2.76 (1 H, m, C(5)H), 2.28-2.22 (2 H, m, C(3)H and C(7)H), 2.15-2.07 (2 H, m, C(3)H and C(8)H), 2.04-1.98 (1 H, m, C(7)H), 1.94-1.91 (1 H, m, C(4)H), 1.81-1.78 (1 H, m, C(4)H) and 1.65-1.60 (1 H, m, C(8)H); **C(100 MHz) 168.5 (C=O), 166.1 (C=O), 133.7 (Ar), 133.5 (Ar), 133.0 (Ar), 130.4 (Ar), 130.2 (Ar), 129.8 (Ar), 129.5 (Ar), 129.4 (Ar), 128.5 (Ar), 90.8 (COH), 86.3 (CO), 78.4 (CO), 54.2 (CH), 34.1 (CH2), 32.5 (CH2), 32.1 (CH2) and 20.8 (CH2); *m/z* (CI) 367 (15%), 245 (20), 139 (95), 122 (90), 121 (95), 105 (75), 94 (100), 80 (55) and 78 (55) (Found: M + H+, 367.1535. C22H23O5 requires *M*, 367.1545).

Derivatisation of bicyclic alcohol 29 for *ee* determination

4,7-Bis(*tert*-butyldimethylsilyloxy)bicyclo[3.3.0]oct-2-yl-2’,4’-dinitrobenzoate

Et3N (0.10 cm3, 0.72 mmol) was added to a stirred solution of bicyclic alcohol **29** (18 mg, 0.050 mmol) and 2,4-dinitrobenzoyl chloride (70 mg, 0.35 mmol) in dry CH2Cl2 (1 cm3). The solution was stirred for 18 h, and evaporated under reduced pressure directly onto SiO2, before purification by column chromatography (5% Et2O in light petroleum) to give the title compound (17 mg, 62%) as a semi solid; *R*f 0.23 (10% Et2O in light petroleum); *v*max/cm1 2954m, 2857m, 1716s, 1461w, 1382w, 1274m, 1251m, 1095m, 836m and 776s; **H(400 MHz) 8.72-7.88 (3 H, m, Ar), 5.26-5.20 (1 H, m, C(2)H), 4.21-4.07 (2 H, m, C(4)H and C(7)H), 2.73-2.29 (2 H, m, C(1)H and C(5)H), 2.24-1.62 (6 H, m, C(3)H2, C(6)H2 and C(8)H2), 0.92 (9 H, s, SiCMe3), 0.89 (9 H, s, SiCMe3), 0.06 (6 H, s, 2  SiMe) and 0.05 (6 H, s, 2 SiMe); **C(100 MHz) 163.3 (C=O), 148.8 (Ar), 148.2 (Ar), 132.9 (Ar), 131.2 (Ar),127.3 (Ar), 119.6 (Ar), 75.6 (CO), 74.0 (CO), 69.7 (CO), 43.7 (CH), 41.0 (CH), 36.6 (CH2), 36.2 (CH2), 35.5 (CH2), 25.8 (SiC*Me*3), 25.6 (SiC*Me*3), 18.2 (Si*C*Me3), 18.0 (Si*C*Me3), –4.7 (2 SiMe), –4.8 (SiMe) and –4.9 (SiMe); *m/z* (CI) 581 (95%), 521 (25), 467 (30), 387 (100), 270 (65) and 156 (90) (Found: M + H+, 581.2717. C27H45N2O8Si2 requires *M*, 581.2714).

4,7-Dihydroxybicyclo[3.3.0]oct-2-yl-2',4'-dinitrobenzoate

BF3.Et2O (0.01 cm3, 79 µmol) was added dropwise to a stirred solution of the above 2,4-dinitrobenzoate (8 mg, 0.014 mmol) in CH2Cl2 (0.5 cm3) at 0 oC. The solution was stirred for 3 hours and then Et3N (0.015 cm3, 0.11 mmol) was added dropwise, before addition of CH2Cl2 (10 cm3). The reaction mixture was washed with brine (2  2 cm3), dried and evaporated under reduced pressure. Purification of the residue by column chromatography (EtOAc) gave the title compound (5 mg, 100%) as a solid; *R*f 0.32 (EtOAc); *v*max/cm1 2954s, 2857m, 1716s, 1461w, 1274m, 1251m, 1095m, 836s and 776s; **H(400 MHz) 8.74-7.94 (3 H, m, Ar), 5.54-5.42 (1 H, m, C(2)H), 4.43-4.28 (2 H, m, C(4)H and C(7)H), 3.27-2.79 (4 H, m, C(1)H, C(5)H and OH) and 2.36-1.61 (6 H, m, C(3)H2, C(6)H2 and C(8)H2); **C(100 MHz) 163.1 (C=O), 148.9 (Ar), 148.2 (Ar), 131.5 (Ar), 127.5 (Ar), 125.2 (Ar), 119.5 (Ar), 78.0 (CO), 74.3 (CO), 71.5 (CO), 47.9 (CH), 46.1 (CH), 41.0 (CH2), 36.0 (CH2) and 35.2 (CH2); *m/z* (CI) 56 (100%), 139 (20) and 109 (20) (Found: M + H+, 353.0983. C15H17N2O8 requires *M*, 353.0985).

**Derivatisation of bicyclic alcohol 33 for *ee* determination**

4,7-Bis(*tert*-butyldimethylsilyloxy)bicyclo[3.3.0]octan-2-yl-3’,5’-dinitrobenzoate

Et3N (0.10 cm3, 0.72 mmol) was added to a stirred solution of bicyclic alcohol **32** (18 mg, 0.047 mmol) and 3,5-dinitrobenzoyl chloride (70 mg, 0.35 mmol) in CH2Cl2 (1 cm3). The solution was stirred for 16 h and then evaporated under reduced pressure directly onto SiO2, before purification by column chromatography (5% Et2O in light petroleum) to give the title compound (15 mg, 58%) as an oil; *R*f 0.23 (10% Et2O in light petroleum); *v*max/cm1 2931m, 1728s, 1552s, 1464w, 1344s, 1280m, 1167m, 1048m, 990m, 833m, 776m and 726m; **H(400 MHz) 9.23 (1 H, t, *J* 2.0, C(4’)H), 9.13 (2 H, d, *J* 2.0, C(2’)H and C(5’)H), 5.72-5.66 (1 H, m, C(2)H), 4.36-4.34 (1 H, m, C(7)H), 3.98-3.96 (1 H, m, C(4)H), 3.31-3.23 (1 H, m, C(1)H), 2.71-2.64 (1 H, m, C(5)H), 2.13-2.08 (1 H, m, C(3)H), 2.00-1.92 (2 H, m, C(3)H and C(6)H), 1.62-1.59 (2 H, m, C(8)H2) 1.35-1.28 (1 H, m, C(6)H), 0.90 (9 H, s, SiCMe3), 0.85 (9 H, s, SiCMe3), 0.06 (3 H, s, SiMe), 0.05 (3 H, s, SiMe), 0.02 (3 H, s, SiMe) and 0.01 (3 H, s, SiMe); **C(100 MHz) 161.1 (C=O), 148.6 (Ar), 134.1 (Ar), 129.3 (Ar), 119.0 (Ar), 78.7 (CO), 75.9 (CO), 75.1 (CO), 50.9 (CH), 42.0 (CH), 40.8 (CH2), 38.6 (CH2), 36.1 (CH2), 25.8 (SiC*Me*3), 25.7 (SiC*Me*3), 18.1 (*C*Me3), 18.0 (*C*Me3), –4.8 (2 SiMe) and –4.9 (2 SiMe); *m/z* (CI) 522 (65%), 271 (100), 254 (30), 167 (90), 133 (65) and 92 (50) (Found: M + NH4+, 598.2993. C27H48N3O8Si2 requires *M*, 598.2980).

4,7-Dihydroxybicyclo[3.3.0]octan-2-yl-3’,5’-dinitrobenzoate

BF3.Et2O (0.10 cm3, 0.79 mmol) was added dropwise to a stirred solution of the above 3,5-dinitrobenzoate (31 mg, 88 µmol) in CH2Cl2 (3 cm3) at 0 oC. The solution was stirred for 3 h and then Et3N (0.19 cm3, 1.4 mmol) was added dropwise, before addition of CH2Cl2 (20 cm3). The solution was washed with brine (2  4 cm3), dried and evaporated under reduced pressure. Purification of the residue by column chromatography (EtOAc) gave the title compound (5 mg, 100%) as a solid; *R*f 0.25 (EtOAc); *v*max/cm1 2954s, 2857s, 1718s, 1464m, 1273m, 1257m, 1093m and 778s; **H(400 MHz, CD3OD) 9.25-9.22 (1 H, m, Ar), 9.12-9.09 (2 H, m, Ar), 5.71-5.65 (1 H, m, C(2)H), 4.39-4.37 (1 H, m, C(4)H or C(7)H), 4.03-3.98 (1 H, m, C(4)H or C(7)H), 3.34-3.24 (1 H, m, C(1)H), 2.74-2.68 (1 H, m, C(5)H) and 2.26-1.20 (6 H, m, C(3)H2, C(6)H2 and C(8)H2); *m/z* (CI) 353 (10%), 156 (100), 139 (20) and 109 (20) (Found: M + H+, 353.0983. C15H17N2O8 requires *M*, 353.0985).

**Derivatisation of allylic alcohol 33 for *ee* determination**

**Bis(*tert*-butyldimethylsilyloxy)cyclooct-2-en-1-yl-3’,5’-dinitrobenzoate**

Data *via* Table 3, entry 2: Et3N (0.10 cm3, 0.72 mmol) was added to a stirred solution of allylic alcohol **33** (18 mg, 0.047 mmol) and 3,5-dintrobenzoyl chloride (70 mg, 0.35 mmol) in dry CH2Cl2 (1 cm3). The solution was stirred for 16 h, and then evaporated under reduced pressure directly onto silica, before purification by column chromatography (5% Et2O in light petroleum) gave the title compound (15 mg, 58%) as an oil; *R*f 0.23 (10% Et2O in light petroleum); *v*max/cm1 3104w, 2930m, 2857m, 1734m, 1549s, 1462w, 1344s, 1276m, 1169m, 1075m, 836m, 775m and 722m; **H(500 MHz) 9.15 (1 H, t, *J* 2.0, C(4’)H), 9.09 (2 H, d, *J* 2.0, C(2’)H, and C(5’)H), 6.33-6.29 (1 H, m, C(1)H), 5.69 (1 H, dd, *J* 7.0, 5.0, C(3)H), 5.65 (1 H, dd, *J* 7.0, 5.0, C(2)H), 4.63-4.60 (1 H, m, C(4)H), 3.83-3.79 (1 H, m, C(7)H), 2.11-2.03 (3 H, m, C(6)H and C(8)H2), 1.70-1.61 (3 H, m, C(5)H2 and C(6)H), 0.82 (18 H, s, 2 SiCMe3), 0.00 (6 H, s, 2 SiMe), –0.01 (3 H, s, SiMe) and –0.03 (3 H, s, SiMe); **C(125 MHz) 160.3 (C=O), 147.6 (Ar), 134.7 (*C*=C), 133.4 (Ar), 128.5 (Ar), 126.8 (*C*=C), 121.2 (Ar), 71.1 (CO), 68.9 (CO), 67.4 (CO), 41.0 (CH2), 32.5 (CH2), 31.6 (CH2), 24.8 (2 SiC*Me*3), 17.2 (*C*Me3), 17.0 (*C*Me3) and 0.0 (4 SiCH3); *m/z* (CI) 598 (100%), 581 (15), 449 (50), 369 (80), 255 (50), 237 (55), 132 (90) and 107 (55) (Found: M + H+, 581.2712. C27H45N2O8Si2 requires *M*, 581.2714).

(1*S*,4*S*,7*R*)-4,7-Dihydroxycyclooct-2-en-1-yl-3’,5’-dinitrobenzoate

BF3.Et2O (0.10 cm3, 0.79 mmol) was added dropwise to a stirred solution of a mixture of the above 3,5-dinitrobenzoate (31 mg, 88 µmol) in CH2Cl2 (3 cm3) at 0 ˚C. The solution was stirred for 3 h and then Et3N (0.19 cm3, 1.4 mmol) was added dropwise, before dilution with CH2Cl2 (20 cm3). The solution was washed with brine (2  4 cm3), dried and evaporated under reduced pressure. Purification of the residue by column chromatography (EtOAc) gave the title compound (5 mg, 100%) as a solid; *R*f 0.25 (EtOAc); *v*max/cm1 3307br w, 2923s, 2852m, 1722m, 1530m, 1461m, 1344m, 1270m, 1034m, 706s and 673s; **H(500 MHz, d6-DMSO) 9.09-9.03 (1 H, m, C(4’)H), 8.95-8.88 (2 H, m, C(2’)H and C(5’)H), 6.11-6.07 (1 H, m, C(1)H), 5.73-5.63 (2 H, m, C(2)H and C(3)H), 5.02-4.97 (1 H, m, OH), 4.75-4.66 (2 H, m, C(4)H and OH), 3.80-3.75 (1 H, m, C(7)H), 2.36-2.30 (1 H, m, C(8)H), 2.01-1.96 (1 H, m, C(8)H), 1.85-1.78 (1 H, m, C(5)H), 1.72-1.66 (2 H, m, C(6)H2) and 1.56-1.50 (1 H, m, C(5)H); **C(125 MHz, d6-DMSO) 161.9 (C=O), 148.6 (Ar), 136.9 (*C*=C), 133.0 (Ar), 129.0 (Ar), 126.8 (*C*=C), 122.7 (Ar), 71.9 (CO), 66.8 (CO), 66.4 (CO), 40.6 (CH2), 32.4 (CH2) and 32.0 (CH2).

**Preparation of epoxide 36**

**(3*R**,8*S**)-3,8-Bis(*tert*-butyldimethylsilyloxy)cyclooctene**

(1*R**,4*S**)-Cyclooct-2-ene-1,4-diol1 (77 mg, 0.54 mmol), TBDMSCl (200 mg, 1.3 mmol) and imidazole (186 mg, 2.7 mmol) were stirred in dry DMF (2.5 cm3) at 25 °C for 15 h. The solution was then diluted with CH2Cl2 (20 cm3) and washed with H2O (2  15 cm3), saturated aqueous CuSO4 (2  15 cm3) and brine (15 cm3) before the organic layers were dried and evaporated under reduced pressure. Purification of the residue by column chromatography (5% Et2O in light petroleum) gave the title compound (143 mg, 71%) as a clear oil; *R*f 0.7 (10% Et2O in light petroleum); *v*max/cm1 2930s, 2858s, 1472m, 1463m, 1362m, 1256s, 1077s, 871s, 836s and 775s; **H(200 MHz) 5.44 (2 H, d, *J* 4.4, C(1)H and C(2)H), 4.55-4.33 (2 H, m, C(3)H and C(8)H), 1.91-1.33 (8 H, m, C(4)H2, C(5)H2, C(6)H2 and C(7)H2), 0.90 (18 H, s, 2 CMe3), 0.07 (12 H, s, 4 SiMe); **C (50 MHz, CDCl3) 133.2 (*C*=C), 70.1 (*C*OSi), 39.4 (CH2), 25.8 (2 SiC*Me*3), 23.6 (CH2), 18.1 (CMe3), –4.8 (2 SiMe) and –5.0 (2 SiMe); *m/z* (CI) 388 (10%), 371 (10), 239 (100), 132 (30), 124 (80) and 107 (50) (Found: M + NH4+, 388.3066. C20H46NO2Si2 requires *M*, 388.3067).

**(1*R**,2*S**,7*R**,8*S**)-9-Oxabicyclo[6.1.0]nonane-2,7-diol**

**Method 1:** MCPBA (50% w/w pure; 470 mg, 1.4 mmol) was added portionwise to a stirred solution of (1*R**,4*S**)-cyclooct-2-ene-1,4-diol1 (50 mg, 0.35 mmol), and Na2CO3 (160 mg, 1.5 mmol) in 30% MeOH/CH2Cl2 (7 cm3) solution at 0 °C. The ice bath was removed and the solution was stirred for 18 h before NaOH (2 mol dm3, 7 cm3) was slowly added. The aqueous layer was transferred to a liquid-liquid extractor and continuously extracted with EtOAc for 24 h. The combined organic layers were dried and evaporated under reduced pressure. Purification of the residue by column chromatography (10% MeOH/CH2Cl2) gave the title compound (46 mg, 83%) as a white solid (Found: C, 60.8; H, 9.1. C8H14O3 requires C, 60.7; H, 8.9%); mp 175-178 °C; *R*f 0.3 (10% MeOH/CH2Cl2); *v*max(KBr)/cm1 3283br s, 2926s, 2913s, 1364m, 1120m, 1043s, 987s, 948m, 791m and 550w; (Found: C, 60.8; H, 9.1%. C8H14O3 requires C, 60.7; H, 8.9%); **H(400 MHz, CD3OH) 3.54-3.49 (2 H, m, C(2)H and C(7)H), 2.96-2.92 (2 H, m, C(1)H and C(8)H) and 1.84-1.44 (8 H, m, C(3)H2, C(4)H2, C(5)H2 and C(6)H2); **C(100 MHz, CD3OD) 72.6 (COH), 61.1 (*C*OC), 40.0 (CH2), 36.9 (CH2).

**Method 2:** *tert*-Butyl hydroperoxide (80 µl, 4.6 mol dm3 in CH2Cl2, 0.37 mmol) was added dropwise to a cooled solution of (1*R**,4*S**)-cyclooct-2-ene-1,4-diol1 (40 mg, 0.28 mmol) and VO(acac)2 (0.4 mg, 1.5 mmol) in CH2Cl2 (1 cm3). The solution was then stirred and heated to a gentle reflux for 24 h. SiO2 was added and the mixture stirred for a further 1 h before evaporation of the solvent under reduced pressure. Purification of the residue by column chromatography (10% MeOH/CH2Cl2) gave the title compound (18 mg, 41%) as a white solid.

**(1*R**,2*S**,7*R**,8*S**)-2,7-Bis(*tert*-butyldimethylsilyloxy)-9-oxabicyclo[6.1.0]nonane 36**

**Method 1:** MCPBA (50% w/w pure; 141 mg, 0.41 mmol) was added portionwise to a stirred solution of (3*R**,8*S**)-3,8-bis(*tert*-butyldimethylsilyloxy)cyclooctene (98 mg, 0.27 mmol) and Na2CO3 (58 mg, 0.55 mmol) in CH2Cl2 (3 cm3) at 0 °C. The reaction mixture was allowed to warm to 25 °C and stirred for 28 h before NaOH (2 mol dm3, 7 cm3) was slowly added. The organic layer was then separated and washed with H2O (until the washings were neutral), dried, and evaporated under reduced pressure. Purification of the residue by column chromatography (5% Et2O in light petroleum) gave the title compound (45 mg, 44%) as a clear oil which solidified on standing in the refrigerator over several days; *R*f 0.45 (10% Et2O in light petroleum); *v*max/cm1 2953s, 2930s, 2858s, 1473m, 1251m, 1081s, 1006m, 901m, 888m, 857m, 838s, 777s and 670m; **H(400 MHz, CDCl3) 3.53-3.47 (2 H, m, C(2)H and C(7)H), 2.94-2.90 (2 H, m, C(1)H and C(8)H), 1.78-1.40 (8 H, m, C(3)H2, C(4)H2, C(5)H2 and C(6)H2), 0.91 (18 H, s, 2 CMe3), 0.13 (6 H, s, 2 SiMe), and 0.10 (6 H, s, 2 SiMe); **C(100 MHz, CDCl3) 72.5 (COSi), 59.9 (*C*OC), 36.5 (CH2), 25.8 (2 SiC*Me*3), 23.8 (CH2), 18.1 (2 *C*Me3), -4.5 (2 SiMe), and -5.0 (2 SiMe); *m/z* (CI) 404 (100%), 369 (30) and 197 (30) (Found: M + NH4+, 404.3016. C20H46NO3Si2 requires *M*, 404.3009).

**Method 2:** (1*R**,2*S**,7*R**,8*S**)-9-Oxabicyclo[6.1.0]nonane-2,7-diol (231 mg, 1.5 mmol), TBDMSCl (500 mg, 3.31 mmol) and imidazole (450 mg, 6.6 mmol) were stirred in DMF (10 cm3) at 25 °C for 15 h. The solution was then diluted with CH2Cl2 (100 cm3) and washed with H2O (2  70 cm3), saturated aqueous CuSO4 (2  70 cm3) and brine (70 cm3) before the organic layers were dried and evaporated under reduced pressure. Purification of the residue by column chromatography (5% Et2O in light petroleum) gave the title compound (491 mg, 87%) as a clear oil which solidified on standing in the refrigerator over several days.

*Crystal data* for (1*R**,2*S**,7*R**,8*S**)-9-oxabicyclo[6.1.0]nonane-2,7-diol: C8H14O3, *M*r = 158.20, Monoclinic, *P*21/*c*, *a* = 7.0731 (17) Å, *b* = 13.026 (3) Å, *c* = 8.708 Å, ** = 99.73 (2)˚, *V* = 790.8 Å3, *Z* = 4, 1613 independent reflections measured at 150 K on an Enraf Nonius CAD-4 diffractometer. Cu-*K* radiation. 1517 Reflections with *I*>3 and 156 parameters give *R* = 0.0625, *wR* = 0.0769. CCDC 164711. Crystal data are availible in CIF format from the RSC web site, see: http://www.rsc.org/suppdata/xx/xxxx/xxx/

**Preparation of epoxides 37 from hemiacetal 21**

**Cyclooct-6-ene-1,4-dione**

Hemiacetal **21** (2.0 g, 14 mmol) in CH2Cl2 (20 cm3) was added dropwise to a stirred solution of PCC (9.3 g, 43 mmol) in CH2Cl2 (50 cm3). The solution was stirred overnight before being diluted with Et2O (70 cm3) and the organic phase decanted. The black residue was washed with Et2O (3  20 cm3) and then the combined organic fractions were filtered through a Florisil plug. The solvent was evaporated under reduced pressure and the residue purified by bulb to bulb distillation to afford cyclooct-6-en-1,4-dione (1.64 g, 83%) as a pale yellow oil. b.p. 65-70 ˚C (3 mmHg); *v*max/cm–1 3034m, 2966m, 1706s, 1437m, 1321m, 1274m, 1123m, 823m, 774w; **H (200 MHz) 5.80 (2 H, t, *J* 4.5, C(6)H and C(7)H), 3.18 (4 H, d, *J* 4.5, C(5)H2 and C(8)H2), 2.70 (4 H, s, C(2)H2 and C(3)H2); **C (50 MHz, CDCl3) 209.0 (C=O), 126.2 (*C*=C), 44.1 (CH2), 39.6 (CH2); *m/z* (CI) 156 (100%) and 154 (25) (Found: M + NH4+, 156.1028. C8H14NO2 requires *M*, 156.1025).

**1,4,9,12-Tetraoxa-dispiro[4.2.4.4]-(*Z*)-hexadec-14-ene**

Cyclooct-6-ene-1,4-dione (1.47 g, 11 mmol), ethylene glycol (5.25 cm3, 94 mmol), anhydrous oxalic acid (675 mg, 7.5 mmol) and trimethyl orthoformate (3.75 cm3, 34 mmol) were stirred in MeCN (75 cm3) overnight at room temperature.2 The solution was then poured over H2O (75 cm3) and neutralised by the addition of solid NaHCO3. The solution was extracted with Et2O (3  75 cm3) and the combined organic fractions were washed with NaHCO3 solution (75 cm3), dried and evaporated under reduced pressure. Purification by flash chromatography (Et2O/light petroleum) afforded 1,4,9,12-tetraoxa-dispiro[4.2.4.4](*Z*)-hexadec-14-ene (1.93 g, 75%) as a pale yellow oil. *R*f 0.51 (Et2O); *v*max/cm–1 3029m, 2946s, 2879s, 1456m, 1436m, 1360s, 1140s, 1081s, 995s, 948s, 925s, 796s; **H (400 MHz) 5.67-5.59 (2 H, m, C(1)H and C(2)H), 3.90-3.81 (8 H, m, C(4’)H2 and C(5’)H2), 2.34 (4 H, d, *J* 5.4, C(3)H2 and C(8)H2), 1.71 (4 H, s, C(5)H2 and C(6)H2); **C (100 MHz) 128.2 (*C*=C), 112.2 (*C*(OCH2)2), 64.3 (*C*H2(OC)), 35.2 (CH2), 31.7 (CH2); *m/z* (CI) 227 (30%), 165 (100) and 127 (20) (Found: M + Na+, 249.1100. C12H18NaO4 requires *M*, 249.1103).

**(14*R**,15*S**)-1,4,9,12-Tetraoxa-dispiro[4.2.4.4]-hexadec-14-ene oxide 37 (n=1)**

Trifluoroacetone (7.7 cm3, 86 mmol) was added *via* a precooled syringe to a stirring solution of 1,4,9,12-Tetraoxa-dispiro[4.2.4.4]-(*Z*)-hexadec-14-ene (1.77 g, 7.82 mmol) and Na2EDTA (0.4 mmol dm–3 in H2O; 39 cm3, 15.6 µmol) in MeCN (100 cm3) at 0 ˚C. Oxone® (24.0 g, 39.0 mmol) and NaHCO3 (6.6 g, 62.3 mmol) were ground together and then added portionwise over 15 min while maintaining the temperature at 0 ˚C.3 After 40 min H2O (500 cm3) was added and the solution was extracted with CH2Cl2 (3  250 cm3). The combined organic fractions were dried and evaporated under reduced pressure. Purification by flash chromatography (Et2O/light petroleum) afforded **37** (n=1) (1.62 g, 86%) as a white solid. *R*f 0.39 (Et2O); *v*max (thin film)/cm–1 2964m, 2892m, 1465m, 1215m, 1126s, 1040s, 956s; **H (400 MHz, CDCl3) 3.97-3.85 (8 H, m, C(4’)H2 and C(5’)H2), 3.06-3.01 (2 H, m, C(1)H and C(8)H), 2.33-2.28 (2 H, m, C(2)H and C(7)H), 1.94-1.87 (2 H, m, C(4)H and C(5)H), 1.72-1.61 (2 H, m, C(4)H and C(5)H), 1.61-1.55 (2 H, m, C(2)H and C(7)H); **C (100 MHz, CDCl3) 109.9 (*C*(OCH2)2), 64.6 (*C*H2(OC)), 64.2 (*C*H2(OC)), 52.6 (*C*OC), 36.3 (CH2), 31.6 (CH2); *m/z* (CI) 243 (100%) and 165 (15) (Found: M + H+, 243.1234. C12H19O5 requires *M*, 243.1232).

**1,5,10,14-Tetraoxa-dispiro[5.2.5.4]-(*Z*)-octadec-15-ene**

TMSOTf (0.005 cm3, 28 µmol) was added to a stirred solution of cyclooct-6-ene-1,4-dione (50 mg, 0.36 mmol) and 1,3-*bis*(trimethylsilyloxy)propane in CH2Cl2 (1 cm3) at –78 ˚C.4 After 1 h the solution was allowed to warm to room temperature over 5 h before pyridine (0.3 cm3) was added. The solution was then poured onto NaHCO3 solution and extracted with Et2O (3  5 cm3). The combined organic fractions were dried and evaporated under reduced pressure. Purification by flash chromatography afforded the 1,5,10,14-Tetraoxa-dispiro[5.2.5.4]-(*Z*)-octadec-15-ene (51 mg, 56%) as an oil. *R*f 0.27 (Et2O/light petroleum); *v*max/cm–1 3028w, 2959s, 2866s, 1458m, 1364m, 1254m, 1131s, 1095s, 996s, 792m; **H (400 MHz) 5.68-5.53 (2 H, m, C(1)H and C(2)H), 3.92-3.75 (8 H, m, C(4’)H2 and C(6’)H2), 2.67-1.53 (12 H, m, C(3)H2, C(5)H2, C(6)H2, C(8)H2 and C(5’)H2); **C (100 MHz) 127.8 (*C*=C), 101.6 (*C*(OCH2)2), 59.5 (*C*H2(OC)), 32.3 (CH2), 28.3 (CH2), 25.5 (CH2). *m/z* (CI) 273 (10%), 255 (10) and 179 (100). (Found: M + H+, 255.1599. C14H23O4 requires *M*, 255.1596).

**(14*R**, 15*S**)-1,5,10,14-Tetraoxa-dispiro[5.2.5.4]-octadec-15-ene oxide 37 (n=2)**

Following the preparation of epoxide **37** **(n=1)**, 1,5,10,14-Tetraoxa-dispiro[5.2.5.4]-(*Z*)-octadec-15-ene (51 mg, 0.20 mmol), trifluoroacetone (0.30 cm3, 3.4 mmol), Oxone® (840 mg, 1.4 mmol) and Na2EDTA (1.4 cm3 of a 0.4 mM solution in H2O, 0.56 µmol)3 afforded epoxide **37** (n=2) (30 mg, 56%) as a white solid. *R*f 0.4 (Et2O); *v*max (thin film)/cm–1 2954s, 2865m, 1466m, 1219m, 1187m, 1126s, 1045s, 956m, 778m; **H (500 MHz, d8 toluene, 80 ˚C) 3.61-3.52 (8 H, m, C(4’)H2 and C(6’)H2), 2.96-2.91 (2 H, m, C(1)H and C(8)H), 2.86-2.79 (2 H, m, C(2)H and C(7)H), 2.13-2.06 (2 H, m, C(4)H and C(5)H), 1.88-1.77 (2 H, m, C(4)H and C(5)H), 1.44-1.27 (6 H, m, C(2)H, and C(7)H, and C(5’)H2); **C (125 MHz, d8-toluene, 80 ˚C) 100.0 (*C*(OCH2)2), 59.2 (*C*H2(OC)), 59.0 (*C*H2(OC)), 52.3 (*C*OC), 33.6 (CH2), 29.3 (CH2), 25.7 (CH2); *m/z* (CI) 288 (45%), 271 (35), 212 (75) and 195 (100) (Found: M + H+, 271.1549. C14H23O5 requires *M*, 271.1545).

**Preparation of epoxides 38.**

**1,4,11,14-Tetraoxa-dispiro[4.4.4.4]-(*Z*)-octadec-7-ene**

Following the preparation of 1,4,9,12-tetraoxa-dispiro[4.2.4.4]-(*Z*)-hexadec-14-ene, cyclodec-3-ene-1,6-dione5 (1.17 g, 7.1 mmol), ethane 1,2-diol (3.7 g, 60 mmol), trimethylorthoformate (2.7 g, 24 mmol) and oxalic acid (0.5 g, 5.6 mmol) gave 1,4,11,14-tetraoxa-dispiro[4.4.4.4]-(*Z*)-octadec-7-ene (839 mg, 47%) as a white solid, m.p. 156-158 ˚C, *R*f (4:1 petrol 30-40 ˚C: ether) 0.13; *v*max (solution CDCl3)/cm–1 1474; **H (400 MHz,) 5.61 (2 H, t, *J* 5.5, vinyl-H), 3.95 (8 H, br s, 4  OCH2), 2.97 (2 H, br,m, 2  C*H*AHB), 2.24-2.00 (2 H, br, CHA*H*B) and 1.95-1.30 (8 H, br, 4  CH2); better quality data was not available due to presence of conformers or inseparable impurities. This material was transformed into desired epoxide **38** (n=1) with dioxirane oxidation.

**(7*R**, 8*S**)-1,4,11,14-Tetraoxa-dispiro[4.4.4.4]-octadec-7-ene oxide 38 (n=1)**

Following the preparation of epoxide **37** (n=1), 1,4,11,14-tetraoxa-dispiro[4.4.4.4]-(*Z*)-octadec-7-ene (839 mg, 3.36 mmol), trifluoroacetone (3.6 cm3, 40 mmol), Oxone® (8.2 g, 13 mmol) and Na2EDTA (0.4 mmol dm–3 solution in H2O, 17 cm3, 6.7 µmol) gave epoxide **36** (n=1)(773 mg, 85%) as a white solid, m.p. 200-201 ˚C, *R*f (4:6 light petroleum: ether) 0.12; *v*max (solution CDCl3)/cm–1 2957, 2887, 1472, 1373 and 1326; **H (400 MHz) 4.05-3.90 (8 H, m, 4  CH2O), 3.13 (2 H, d, *J* 11, C*H*AHB), 2.18 (2 H, d, *J* 6.5, epoxide-CH), 1.83 (4 H, dd, *J* 10.5 and 6.5, CHA*H*B) and 1.67-1.43 (8 H, m, 4  CH2); **C (101 MHz) 110.1 [C(OR)2], 64.6 (CO), 64.3 (CO), 54.9 (epoxide-C), 34.8, 31.5 and 21.0; *m/z* (CI) 271 (50%, M + H), 255 (100, MH – 16), 209 (30, MH – 62) and 193 (30, MH – 78) (Found: M + H+, 271.1542. C14H23O5 requires *M*, 271.1545).

**1,5,12,16-Tetraoxa-dispiro[5.4.5.4]-(*Z*)-eicos-8-ene**

Following the preparation of 1,4,9,12-Tetraoxa-dispiro[4.2.4.4]-(*Z*)-hexadec-14-ene, cyclodec-3-ene-1,6-dione (300 mg, 1.8 mmol), propane 1,3-diol (1.2 g, 15 mmol), trimethyl orthoformate (668 mg, 6.3 mmol) and oxalic acid (130 mg, 1.4 mmol) gave 1,5,12,16-Tetraoxa-dispiro[5.4.5.4]-(*Z*)-eicos-8-ene (479 mg, 94%) as a white solid, m.p. 125 ˚C; *R*f (4:1 light petroleum: ether) 0.20; *v*max (solution CDCl3)/cm–1 2959s, 1484m, 1470m, 1446m, 1383m, 1326m, and 1292m; **H (400 MHz) 5.48 (2 H, dd, *J* 5.5 and 5.5, vinyl-H), 3.87-3.82 (8 H, m, 4  OCH2), 2.53-2.50 (4 H, m, 2  allyl-CH2), 1.96-1.94 (2 H, m, 2  C*H*AHB), 1.74 (2 H, ddd, *J* 13.0, 12.5 and 6.5, 2  CHA*H*B) and 1.59-1.40 (8 H, m, 4  CH2); **C (101 MHz) 127.6 (alkene-C), 102.0 (ketal-C), 60.1 (OCH2), 59.6, 34.6, 27.5, 25.9 and 21.0

**(8*R**, 9*S**)-1,5,12,16-Tetraoxa-dispiro[5.4.5.4]-eicos-8-ene oxide 38 (n=2)**

Following the preparation of epoxide **37** (n=1), 1,5,12,16-tetraoxa-dispiro[5.4.5.4] *Z*-eicos-8-ene(839 mg, 3.36 mmol), trifluoroacetone (0.9 g, 8.21 mmol), Oxone® (4 g, 6.6 mmol) and Na2EDTA (0.4 mmol dm–3 solution in H2O; 8 cm3, 3.3 µmol) gave epoxide **38** (n=2)(773 mg, 85%) as a white solid, m.p. 163-165 ˚C, *R*f (1:1 light petroleum: ether) 0.11; *v*max (solution CDCl3)/cm–1 1469 and 1381; **H (500 MHz) 4.01-3.97 (4 H, m, 2  CH2O), 3.93-3.84 (4 H, m, 2  CH2O), 3.09 (2 H, br d, *J* 10.5, OCH2C*H*2CH2O), 2.69 (2 H, br d, *J* 14.5, OCH2C*H*2CH2O), 2.19-2.10 ( 2 H, m, 2  epoxide-H) and 1.82-1.44 (12 H, m, 6  CH2); **C (126 MHz) 100.0 [C(OR)2], 59.9 (CO), 59.5 (CO), 55.1 (epoxide-C), 33.0, 29.0, 25.7 and 20.8; *m/z* (CI) 299 (60%, M + H), 283 (15), 223 (100) and 207 (30) (Found: M + H+, 299.1856. C16H27O5 requires *M*, 299.1858).*m/z* (CI) 299 (60%), 283 (15), 223 (100) and 207 (25); (Found: M + H+, 299.1856. C16H27O5 requires *M*, 299.1858).

**1,4-Dioxa-spiro[4.7]dodecane 39**

Following the preparation of 1,4,9,12-tetraoxa-dispiro[4.2.4.4] *Z*-hexadec-14-ene, cyclooctanone (630 mg, 5 mmol), ethane 1,2-diol (3.7 g, 60 mmol) and trimethyl orthoformate (2.7 g, 24 mmol) gave 1,4-Dioxa-spiro[4.7]dodecane (490 mg, 58%) as a colourless oil, *R*f (9:1 light petroleum: ether) 0.35; *v*max (solution CDCl3)/cm–1 1471, 1446 and 1372; **H (400 MHz) 3.9 (4 H, s, 4  OCH2) and 1.9-1.4 (14 H, m, 7  CH2). 1H NMR is consistant with that reported earlier.6

***N*-(4-Methylbenzenesulfonyl)-(1*R**,9*S**)-10-oxa-5-azabicyclo[7.1.0]decane 44**

Peracetic acid (36% w/w in dilute AcOH; 50 mm3, 0.27 mmol) was added to a stirred mixture of alkene **42** (62 mg, 0.22 mmol), Na2CO3 (71 mg, 0.67 mmol) and NaOAc (0.4 mg) in CH2Cl2 (1.2 cm3) at 0 ˚C. The reaction was warmed to 25 °C and stirred for a further 15 h. Et2O (20 cm3) was added and the organic layer was washed with H2O (15 cm3), saturated aq. NaHCO3 (2 x 15 cm3), brine (15 cm3), dried and evaporated under reduced pressure. Purification of the residue by column chromatography (40% Et2O in light petroleum) gave the *epoxide* **44** (52 mg, 82%) as a colourless, crystalline solid; mp 102 ˚C dec. (CH2Cl2) (Found: C, 61.2; H, 7.25; N, 4.8%. C15H21NO3S requires C, 60.99; H, 7.17; N, 4.74%); vmax(KBr)/cm1 2964m, 2922m, 2863m, 1598w, 1470m, 1338s, 1159s, 1092m, 1077m, 974m, 712m and 691s; **(300 MHz) 7.72 (2 H, d, *J* 8.3, 2  ArH), 7.34 (2 H, d, *J* 8.3, 2  ArH), 3.20-2.92 (6 H, m, 2  CHO, 2  CH2), 2.44 (3 H, s, CH3), 2.22-2.15 (2 H, m, 2  C*H*H), 2.02-1.90 (4 H, m, 2  CH2) and 1.62-1.53 (2 H, m, 2  CH*H*); **C(50 MHz) 143.6 (Ar, quat.), 133.7 (Ar, quat.), 129.6 (2  ArH), 127.7 (2  ArH), 58.0 (2  CHO), 54.0 (2  CH2N), 26.1 (2  CH2), 24.0 (2  CH2) and 21.5 (Me); *m/z* (CI) 296 (M + H+, 35%) and 204 (100) (Found: M + H+, 296.1320. C15H22NO3S requires *M*, 296.1320).

***N*-(4-Methyl-2-deuteriobenzenesulfonyl)-(1*R**,9*S**)-10-oxa-5-azabicyclo[7.1.0]decane 44-D**

From epoxide **44** (25 mg, 85 mol), Bu*s*Li (1.0 mol dm3 in cyclohexane; 205 mm3, 0.20 mmol), ()-sparteine (0.048 cm3, 0.21 mmol) and Et2O (2.1 mm3) and quenching with D2O, **44-D** was isolated pure by 1H nmr analysis as a colourless, crystalline solid (16.7 mg, 67%) and was shown to have >97% mono-deuterium incorporation by 500 MHz 1H NMR spectroscopy; *R*f 0.41 (20% Et2O in light petroleum);**(300 MHz) 7.70 (1 H, d, *J* 8.3, ArH), 7.34-7.31 (2 H, m, 2  ArH), 3.21-2.87 (6 H, m, 2  CHO, 2  CH2), 2.43 (3 H, s, CH3), 2.21-2.14 (2 H, m, 2  C*H*H), 2.06-1.87 (4 H, m, 2  CH2) and 1.64-1.50 (2 H, m, 2  CH*H*); **C(125 MHz) 143.5 (Ar, quat.), 133.6 (Ar, quat.), 129.6 (ArH), 129.5 (ArH), 127.7 (ArH), 127.4 (ArD, t, *J* 25.5), 57.9 (2  CHO), 54.0 (2  CH2N), 26.1 (2  CH2), 24.0 (2  CH2) and 21.5 (Me); *m/z* (CI) 297 (MH+, 100%), 296 (46), 141 (21) and 140 (32) (Found: M + H+, 297.1383. C15H21DNO3S requires *M*, 297.1383).

***N*-(2,4,6-Triisopropylbenzenesulfonyl)-(*Z*)-2,3,4,7,8,9-hexahydroazonine 42a**

Following the preparation of alkene **42**, but using ditosylate **41** (1.0 g, 2.2 mmol), TrisylNH2 (940 mg, 3.3 mmol), NaOH (18.58 g, 0.46 mol), Bu4NI (1.14 g, 3.10 mmol), toluene (850 cm3 total) and H2O (44 cm3) gave the *alkene* **42** (R = trisyl) as a colourless, crystalline solid (571 mg, 66%); *R*f 0.61 (50% ether-hexane); m.p. 105 ˚C (ether-pentane);(Found: C, 64.4; H, 7.7; N, 4.9%. C15H21NO2S C, 64.49; H, 7.58; N, 5.02%); *v*max (KBr)/cm–1 3056w, 3005s, 2929s, 1596m, 1490m, 1462s, 1360s, 1339s, 1244m, 1156s, 973s and 808s; **H(400 MHz) 7.69 (2 H, d, *J* 8.3, 2  ArH), 7.29 (2 H, d, *J* 8.1, 2  ArH), 5.49 (2 H, t, *J* 5.6, 2  =CH), 2.95 (4 H, t, *J* 6.3, 2  CH2), 2.43-2.39 (7 H, m, 2  CH2, Me) and 1.86-1.78 (4 H, m, 2  CH2); **C(50 MHz) 143.2 (Ar, quat), 134.4 (Ar, quat), 130.1 (2  ArH), 129.5 (2  ArH), 127.6 (2  =CH), 53.3 (2  CH2N), 28.3 (2  CH2), 22.2 (2  CH2) and 21.5 (Me); *m/z* (CI) 576 (34%), 297 (66) and 280 (100)(Found: 280.1371 M + H)+, C15H22NO2S requires *M*H 280.1371).

***N*-(2,4,6-Triisopropylbenzenesulfonyl)-(1*R**,9*S**)-10-oxa-5-azabicyclo[7.1.0]decane**

**44a**

Following the preparation of epoxide **44**, but using alkene **44** (R = trisyl) (100 mg, 0.26 mmol), peracetic acid (36% wt sol. in dilute AcOH; 0.057 cm3, 0.31 mmol, ), Na2CO3 (81 mg, 0.77 mmol), NaOAc (2 mg, catalytic) and CH2Cl2 (1.4 cm3) gave *epoxide* **44** (R = trisyl) as a colourless, crystalline solid (96 mg, 92%). *R*f 0.41 (20% ether-light petroleum); m.p. 102 ˚C decomposed (CH2Cl2); (Found: C, 61.2; H, 7.25; N, 4.8%. C15H21NO3S C, 60.99; H, 7.17; N, 4.74%); *v*max (KBr)/cm–1 3052w, 2967s, 2930s, 2863s, 1599s, 1496m, 1471s, 1339s, 1154s, 1009s, 969s and 641s; **H(300 MHz) 7.72 (2 H, d, *J* 8.3, 2  ArH), 7.34 (2 H, d, *J* 8.3, 2  ArH), 3.20-2.92 (6 H, m, 2  CHO, 2  CH2), 2.44 (3 H, s, Me), 2.22-2.15 (2 H, m, 2  C*H*H), 2.02-1.90 (4 H, m, 2  CH2) and 1.62-1.53 (2 H, m, 2  CH*H*); **C(50 MHz) 143.6 (Ar, quat), 133.7 (Ar, quat), 129.6 (2  ArH), 127.7 (2  ArH), 58.0 (2  CHO), 54.0 (2  CH2N), 26.1 (2  CH2), 24.0 (2  CH2) and 21.5 (Me); *m/z* (CI) 296 (35%) and 204 (100) (Found: 296.1320 M + H+, C15H22NO3S requires *M* 296.1320).

1 – A. Horinaka, R. Nakashima, M. Yoshikawa and T. Matsura, *Bull. Chem. Soc. Jpn,* 1975, **48**, 2095-2098.

2 – P. A. Chaloner, A. B. Holmes, A. McKervey and R. A. Raphael, *J. Chem. Soc., Perkin Trans. 1*, 1977, 2524.

3 – D. Yang, M. K. Wang and Y. C. Yip, *J. Org. Chem.*, 1995, **60** 3887.

4 – T. Tsunoda, M. Suzuki and R. Noyori, *Tetrahedron Lett.*, 1980, **21**, 1357.

5 – L. A. Paquette and J. Mendez-Andino, *Org. Lett.*, 2000, **2**, 1263-1266.

6 – G. Baudin, D. Bondon and Y. Pietrasanta, *Tetrahedron*, 1980, **53**, 5376-5578.
